# Supplementary material for: Automated passive serial dilution microfluidic chip for calcium quantification based on the Arsenazo III method
Source: Royal Society of Chemistry journal article supplement (doi:10.1039/d2sd00022a), 2022-01-01
Supplement: d2sd00022a2.pdf [file d2sd00022a2.pdf]

## Supplementary Document

Supplementary Table I: Calibration of PDMS chip without manifold

| Sample | DI  | Reagent | Reading 1 | Reading 2 | Reading 3 | Average  | Total Average | SD       | AVG SD  |
|--------|-----|---------|-----------|-----------|-----------|----------|---------------|----------|---------|
| 0      | 225 | 25      | 0.032     | 0.032     | 0.031     | 0.031667 | 0.03322       | 0.000577 | 0.00119 |
| 0      | 225 | 25      | 0.033     | 0.034     | 0.035     | 0.034    |               | 0.001    |         |
| 0      | 225 | 25      | 0.032     | 0.034     | 0.036     | 0.034    |               | 0.002    |         |
| 0.5    | 225 | 25      | 0.054     | 0.055     | 0.056     | 0.055    | 0.05378       | 0.001    | 0.00072 |
| 0.5    | 225 | 25      | 0.054     | 0.053     | 0.054     | 0.053667 |               | 0.000577 |         |
| 0.5    | 225 | 25      | 0.052     | 0.053     | 0.053     | 0.052667 |               | 0.000577 |         |
| 1      | 225 | 25      | 0.058     | 0.058     | 0.058     | 0.058    | 0.05811       | 0        | 0.00072 |
| 1      | 225 | 25      | 0.057     | 0.058     | 0.059     | 0.058    |               | 0.001    |         |
| 1      | 225 | 25      | 0.059     | 0.057     | 0.059     | 0.058333 |               | 0.001155 |         |
| 1.5    | 225 | 25      | 0.065     | 0.065     | 0.066     | 0.065333 | 0.06567       | 0.000577 | 0.00077 |
| 1.5    | 225 | 25      | 0.066     | 0.067     | 0.066     | 0.066333 |               | 0.000577 |         |
| 1.5    | 225 | 25      | 0.064     | 0.066     | 0.066     | 0.065333 |               | 0.001155 |         |
| 2      | 225 | 25      | 0.071     | 0.071     | 0.069     | 0.070333 | 0.06967       | 0.001155 | 0.00091 |
| 2      | 225 | 25      | 0.069     | 0.068     | 0.07      | 0.069    |               | 0.001    |         |
| 2      | 225 | 25      | 0.07      | 0.069     | 0.07      | 0.069667 |               | 0.000577 |         |

Supplementary Table II: Manual Calibration without manifold

| Sample | DI  | Reagent | Reading 1 | Reading 2 | Reading 3 | Average  | SD       |
|--------|-----|---------|-----------|-----------|-----------|----------|----------|
| 0.5    | 225 | 25      | 0.047     | 0.047     | 0.045     | 0.046333 | 0.001155 |
| 1      | 225 | 25      | 0.053     | 0.054     | 0.053     | 0.053333 | 0.000577 |
| 1.5    | 225 | 25      | 0.054     | 0.055     | 0.056     | 0.055    | 0.001    |
| 2      | 225 | 25      | 0.059     | 0.061     | 0.061     | 0.060333 | 0.001155 |

Supplementary Table III : Calibration of PDMS chip with manifold

| Sample | DI  | Reagent | Reading 1 | Reading 2 | Reading 3 | Average  | Total average | SD       | Total SD |
|--------|-----|---------|-----------|-----------|-----------|----------|---------------|----------|----------|
| 0      | 225 | 25      | 0.025     | 0.023     | 0.024     | 0.024    | 0.023556      | 0.001    | 0.002037 |
| 0      | 225 | 25      | 0.026     | 0.026     | 0.024     | 0.025333 |               | 0.001155 |          |
| 0      | 225 | 25      | 0.022     | 0.021     | 0.021     | 0.021333 |               | 0.000577 |          |
| 0.5    | 225 | 25      | 0.031     | 0.03      | 0.029     | 0.03     | 0.030111      | 0.001    | 0.000192 |
| 0.5    | 225 | 25      | 0.032     | 0.03      | 0.028     | 0.03     |               | 0.002    |          |
| 0.5    | 225 | 25      | 0.03      | 0.031     | 0.03      | 0.030333 |               | 0.000577 |          |
| 1      | 225 | 25      | 0.036     | 0.035     | 0.035     | 0.035333 | 0.034333      | 0.000577 | 0.001202 |
| 1      | 225 | 25      | 0.035     | 0.034     | 0.035     | 0.034667 |               | 0.000577 |          |

|     |     |    |       |       |       |          |          |          |          |
|-----|-----|----|-------|-------|-------|----------|----------|----------|----------|
| 1   | 225 | 25 | 0.034 | 0.033 | 0.032 | 0.033    |          | 0.001    |          |
| 1.5 | 225 | 25 | 0.041 | 0.039 | 0.039 | 0.039667 | 0.039    | 0.001155 | 0.000667 |
| 1.5 | 225 | 25 | 0.04  | 0.039 | 0.038 | 0.039    |          | 0.001    |          |
| 1.5 | 225 | 25 | 0.038 | 0.038 | 0.039 | 0.038333 |          | 0.000577 |          |
| 2   | 225 | 25 | 0.045 | 0.044 | 0.045 | 0.044667 | 0.043667 | 0.000577 | 0.001453 |
| 2   | 225 | 25 | 0.043 | 0.046 | 0.044 | 0.044333 |          | 0.001528 |          |
| 2   | 225 | 25 | 0.042 | 0.041 | 0.043 | 0.042    |          | 0.001    |          |

Supplementary Table IV: Manual Calibration with manifold

| Sample | DI  | Reagent | Reading 1 | Reading 2 | Reading 3 | AVG      | SD       |
|--------|-----|---------|-----------|-----------|-----------|----------|----------|
| 2      | 225 | 25      | 0.042     | 0.043     | 0.042     | 0.042333 | 0.000577 |
| 1.5    | 225 | 25      | 0.039     | 0.038     | 0.039     | 0.038667 | 0.000577 |
| 1      | 225 | 25      | 0.035     | 0.035     | 0.037     | 0.035667 | 0.001155 |
| 0.5    | 225 | 25      | 0.031     | 0.032     | 0.032     | 0.031667 | 0.000577 |
| 0      | 225 | 25      | 0.021     | 0.02      | 0.022     | 0.021    | 0.001    |

Supplementary Table V: On chip Detection with Spectrometer (Ocean View)

| Concentration | Absorbance 1 | Absorbance 2 | Average absorbance | SD       |
|---------------|--------------|--------------|--------------------|----------|
| 0             | 0.07         | 0.09         | 0.08               | 0.014142 |
| 1.62          | 0.13         | 0.14         | 0.135              | 0.007071 |
| 3.25          | 0.18         | 0.18         | 0.18               | 0        |
| 4.87          | 0.18         | 0.19         | 0.185              | 0.007071 |
| 6.5           | 0.22         | 0.23         | 0.225              | 0.007071 |

Supplementary Table VI: On chip Detection with Smartphone

| Concentration | R1 | R1 | R2 | Abs1     | Abs 2    | Abs 3    | average  | SD       |
|---------------|----|----|----|----------|----------|----------|----------|----------|
| 0             | 61 | 62 | 61 | 0        | 0        | 0        | 0        | 0        |
| 1.62          | 60 | 60 | 58 | 0.007179 | 0.01424  | 0.021902 | 0.01444  | 0.006012 |
| 3.25          | 51 | 54 | 54 | 0.07776  | 0.059998 | 0.052936 | 0.063565 | 0.010443 |
| 4.87          | 50 | 43 | 40 | 0.08636  | 0.158923 | 0.18327  | 0.142851 | 0.041163 |
| 6.5           | 40 | 40 | 43 | 0.18327  | 0.190332 | 0.151861 | 0.175154 | 0.016721 |

Supplementary Table VII: Limit of detection calculation

| Chip Condition              | STD      | Slope  | LOD(mg/dL) | Range          |
|-----------------------------|----------|--------|------------|----------------|
| Off chip (without manifold) | 0.000192 | 0.0028 | 0.2057143  | 1.62-6.5 mg/dL |

|                              |          |        |           |                |
|------------------------------|----------|--------|-----------|----------------|
| Off chip (with manifold)     | 0.00072  | 0.0023 | 0.9391304 | 2.39-9.59mg/dL |
| On chip (portable)           | 0.00707  | 0.0169 | 1.2550296 | 1.62-6.5 mg/dL |
| On chip (smart phone camera) | 0.006012 | 0.0345 | 0.5227826 | 1.62-6.5 mg/dL |

**Supplementary Figure 1: Fabrication of the PDMS chip**

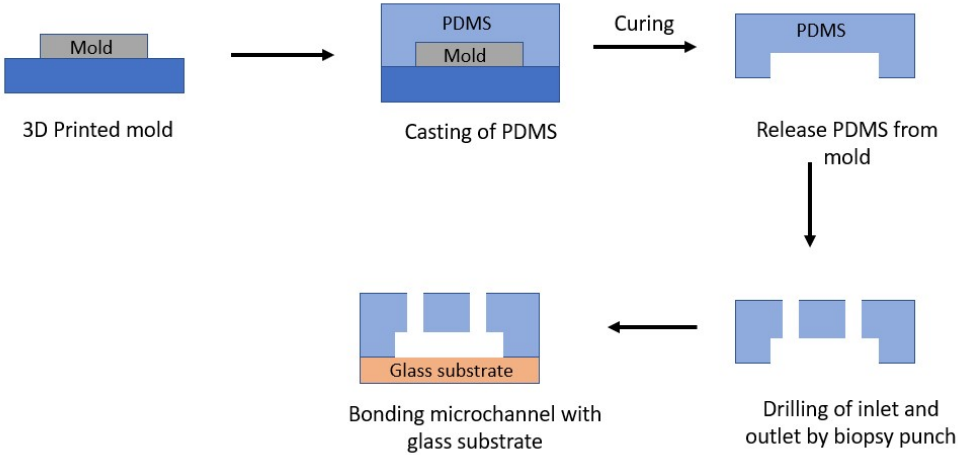

Supplementary Figure 1. Overview of the chip fabrication process. The design of the chip is transferred from a SLA printed 3D mold to PDMS and channels are created by bonding with a glass substrate by air plasma.
